# Supplementary material for: Organic photolysis reactions in tropospheric aerosols: effect on secondary organic aerosol formation and lifetime
Source: Copernicus journal article supplement (doi:10.5194/acp-15-9253-2015), 2015-08-20
Supplement: Supplementary file 1 [file 0SupportingInformation_revision.2.pdf › 0SupportingInformation_revision.2.pdf]

## Annex V: Gas-phase photolysis used in GECKO-A

Table S1: Gas-phase photolysis considered in GECKO-A for various species and functional group surrogates. Photolysis rates are calculated using the TUV model for 40°N and the solar zenith angle of 45°.

| Species / functional group | Reference species           | General formula (SMILES <sup>(*)</sup> ) |                | Typical products                                                               | J(s <sup>-1</sup> ) at SZA=45°                                          |
|----------------------------|-----------------------------|------------------------------------------|----------------|--------------------------------------------------------------------------------|-------------------------------------------------------------------------|
|                            |                             | NO <sub>2</sub>                          |                |                                                                                | 8.08×10 <sup>-3</sup>                                                   |
| entire molecule            | propenal (acrolein)         | C=CC=O                                   | i<br>ii<br>iii | C=CC•=O + HO <sub>2</sub><br>C=C• + CO + HO <sub>2</sub><br>CC•(OO•)* + CO     | 5.55×10 <sup>-7</sup><br>4.16×10 <sup>-7</sup><br>4.16×10 <sup>-7</sup> |
| entire molecule            | methacrolein                | CC(=C)C=O                                | i<br>ii<br>iii | C=C•C + CO + HO <sub>2</sub><br>CC•(OO•)*C + CO<br>C=C(C)CO• + HO <sub>2</sub> | 4.47×10 <sup>-6</sup><br>4.47×10 <sup>-6</sup><br>4.47×10 <sup>-6</sup> |
| entire molecule            | acetone                     | CC(=O)C                                  |                | CC=O• + CH <sub>3</sub> •                                                      | 3.82×10 <sup>-7</sup>                                                   |
| entire molecule            | 2,3-butanedione (biacetyl)  | CC(=O)C(C)=O                             |                | 2 CC•=O                                                                        | 2.29×10 <sup>-4</sup>                                                   |
| entire molecule            | pyruvic acid                | CC(=O)C(O)=O                             |                | CC=O + CO <sub>2</sub>                                                         | 1.03×10 <sup>-4</sup>                                                   |
| entire molecule            | methyl vinyl ketone         | CC(=O)C=C                                | i<br>ii        | C=CC + CO<br>C=C• + CC•=O                                                      | 4.29×10 <sup>-6</sup><br>4.29×10 <sup>-7</sup>                          |
| entire molecule            | methyl glyoxal              | CC(=O)C=O                                | i<br>ii<br>iii | CC•=O + CO + HO <sub>2</sub><br>CC=O + CO<br>CH <sub>4</sub> + 2 CO            | 7.01×10 <sup>-5</sup><br>3.90×10 <sup>-6</sup><br>3.90×10 <sup>-6</sup> |
| entire molecule            | hydroxyacetone              | CC(=O)CO                                 |                | CC•=O + CH <sub>2</sub> O + HO <sub>2</sub>                                    | 1.51×10 <sup>-6</sup>                                                   |
| entire molecule            | 3,3-dimethyl butanal        | CC(C)(C)CC=O                             |                | CC(C)(C)C• + CO + HO <sub>2</sub>                                              | 2.58×10 <sup>-5</sup>                                                   |
| entire molecule            | t-butyl nitrate             | CC(C)(C)O[N](O)=O                        |                | CC(C)(C)O• + NO <sub>2</sub>                                                   | 5.66×10 <sup>-6</sup>                                                   |
| entire molecule            | 2,4-dimethyl-3-pentanone    | CC(C)C(=O)C(C)C                          |                | CC(C)C•=O + CC•C                                                               | 8.30×10 <sup>-6</sup>                                                   |
| entire molecule            | i-butanal (i-butyraldehyde) | CC(C)C=O                                 |                | CC•C + CO + HO <sub>2</sub>                                                    | 3.80×10 <sup>-5</sup>                                                   |
| entire molecule            | 4-methyl-2-pentanone        | CC(C)CC(C)=O                             | i<br>ii        | C•C(C)C + CC•=O<br>CC(=O)C + C=CC                                              | 1.61×10 <sup>-6</sup><br>3.87×10 <sup>-6</sup>                          |

|                 |                       |                            |                |                                                                               |                                                                         |
|-----------------|-----------------------|----------------------------|----------------|-------------------------------------------------------------------------------|-------------------------------------------------------------------------|
| entire molecule | 3-methyl butanal      | CC(C)CC=O                  | i<br>ii        | CC(C)C• + CO + HO <sub>2</sub><br>C=CC + CC=O                                 | 1.54×10 <sup>-5</sup><br>1.05×10 <sup>-5</sup>                          |
| entire molecule | 5-methyl-2-hexanone   | CC(C)CCC(C)=O              | i<br>ii        | C•CC(C)C + CC•=O<br>C=C(C)C + CC(=O)C                                         | 1.28×10 <sup>-6</sup><br>3.06×10 <sup>-6</sup>                          |
| entire molecule | i-propyl nitrate      | CC(C)O[N](O)=O             |                | CC(C)O• + NO <sub>2</sub>                                                     | 1.93×10 <sup>-6</sup>                                                   |
| entire molecule | butane-2,3-dinitrate  | CC(O[N](O)=O)C(C)O[N](O)=O |                | CC(O•)C(C)O[N](O)=O + NO <sub>2</sub>                                         | 7.41×10 <sup>-6</sup>                                                   |
| entire molecule | propane-1,2-dinitrate | CC(O[N](O)=O)CO[N](O)=O    | i<br>ii        | CC(O•)CO[N](O)=O + NO <sub>2</sub><br>CC(O[N](O)=O)CO• + NO <sub>2</sub>      | 3.68×10 <sup>-6</sup><br>3.68×10 <sup>-6</sup>                          |
| entire molecule | crotonaldehyde        | CC=CC=O                    | i<br>ii<br>iii | CC=C• + CO + HO <sub>2</sub><br>CC=CCO• + HO <sub>2</sub><br>CCC• (OO•)* + CO | 3.29×10 <sup>-6</sup><br>3.29×10 <sup>-6</sup><br>3.29×10 <sup>-6</sup> |
| entire molecule | acetaldehyde          | CC=O                       |                | CH <sub>3</sub> • + CO + HO <sub>2</sub>                                      | 3.51×10 <sup>-6</sup>                                                   |
| entire molecule | 3-pentanone           | CCC(=O)CC                  |                | CCCO• + CC•                                                                   | 3.07×10 <sup>-6</sup>                                                   |
| entire molecule | 2-butanone            | CCC(C)=O                   | i<br>ii        | CC•=O + CC•<br>CCC•=O + CH <sub>3</sub> •                                     | 2.54×10 <sup>-6</sup><br>4.37×10 <sup>-7</sup>                          |
| entire molecule | 2-methylbutylnitrate  | CCC(C)CO[N](O)=O           |                | CCC(C)CO• + NO <sub>2</sub>                                                   | 1.70×10 <sup>-6</sup>                                                   |
| entire molecule | butan-2-yl nitrate    | CCC(C)O[N](O)=O            |                | CC(O•)CC + NO <sub>2</sub>                                                    | 1.76×10 <sup>-6</sup>                                                   |
| entire molecule | pentan-3-yl nitrate   | CCC(CC)O[N](O)=O           |                | CCC(O•)CC + NO <sub>2</sub>                                                   | 1.64×10 <sup>-6</sup>                                                   |
| entire molecule | butane-1,2-dinitrate  | CCC(O[N](O)=O)CO[N](O)=O   | i<br>ii        | CCC(O•)CO[N](O)=O + NO <sub>2</sub><br>CCC(O[N](O)=O)CO• + NO <sub>2</sub>    | 5.03×10 <sup>-6</sup><br>5.03×10 <sup>-6</sup>                          |
| entire molecule | propanal              | CCC=O                      |                | CC• + CO + HO <sub>2</sub>                                                    | 1.30×10 <sup>-5</sup>                                                   |
| entire molecule | 2-pentanone           | CCCC(C)=O                  |                | CCC• + CC•=O                                                                  | 4.05×10 <sup>-6</sup>                                                   |
| entire molecule | pentan-2-yl nitrate   | CCCC(C)O[N](O)=O           |                | CC(O•)CCC + NO <sub>2</sub>                                                   | 1.69×10 <sup>-6</sup>                                                   |
| entire molecule | butanal               | CCCC=O                     | i<br>ii        | CCC• + CO + HO <sub>2</sub><br>C=C + CC=O                                     | 8.68×10 <sup>-6</sup><br>2.74×10 <sup>-6</sup>                          |
| entire molecule | pentanal              | CCCCC=O                    | i<br>ii        | CCCC• + CO + HO <sub>2</sub><br>C=CC + CC=O                                   | 6.63×10 <sup>-6</sup><br>9.70×10 <sup>-6</sup>                          |
| entire molecule | hexanal               | CCCCCC=O                   | i<br>ii        | CCCCC• + CO + HO <sub>2</sub><br>C=CCC + CC=O                                 | 3.55×10 <sup>-6</sup><br>8.27×10 <sup>-6</sup>                          |
| entire molecule | n-pentyl nitrate      | CCCCCO[N](O)=O             |                | CCCCCO• + NO <sub>2</sub>                                                     | 1.71×10 <sup>-6</sup>                                                   |

|                 |                            |                           |     |                                      |                       |
|-----------------|----------------------------|---------------------------|-----|--------------------------------------|-----------------------|
| entire molecule | n-butyl nitrate            | CCCCO[N](O)=O             |     | CCCCO• + NO <sub>2</sub>             | 1.71×10 <sup>-6</sup> |
| entire molecule | propyl nitrate             | CCCO[N](O)=O              |     | CCCO• + NO <sub>2</sub>              | 1.84×10 <sup>-6</sup> |
| entire molecule | ethyl nitrate              | CCO[N](O)=O               |     | CCO• + NO <sub>2</sub>               | 1.16×10 <sup>-6</sup> |
| entire molecule | methyl nitrate             | CO[N](O)=O                |     | CH3(O•) + NO <sub>2</sub>            | 7.27×10 <sup>-7</sup> |
| entire molecule | methyl hydroperoxide       | COO                       |     | CH3(O•) + HO                         | 4.25×10 <sup>-6</sup> |
| entire molecule | methyl peroxy nitrate      | COO[N](O)=O               | i   | CH3(OO•) + NO <sub>2</sub>           | 3.12×10 <sup>-6</sup> |
|                 |                            |                           | ii  | CH3(O•) + NO <sub>3</sub>            | 3.12×10 <sup>-6</sup> |
| entire molecule | but-1-ene-3,4-dinitrate    | O[N](=O)OCC(O[N](O)=O)C=C | i   | O[N](=O)OCC(O•)C=C + NO <sub>2</sub> | 2.23×10 <sup>-6</sup> |
|                 |                            |                           | ii  | O•CC(O[N](O)=O)C=C + NO <sub>2</sub> | 2.23×10 <sup>-6</sup> |
| entire molecule | but-2-ene-1,4-dinitrate    | O[N](=O)OCC=CCO[N](O)=O   |     | O•CC=CCO[N](O)=O + NO <sub>2</sub>   | 4.39×10 <sup>-6</sup> |
| entire molecule | 2-methyl hexadienedial     | O=CC(C)=CC=CC=O           | i   | O=CC(C)=CC=C• + CO + HO <sub>2</sub> | 2.46×10 <sup>-5</sup> |
|                 |                            |                           | ii  | CC•=CC=CC=O + CO + HO <sub>2</sub>   | 2.46×10 <sup>-5</sup> |
|                 |                            |                           | iii | O=CC(C)=CC=CC•=O + HO <sub>2</sub>   | 2.46×10 <sup>-5</sup> |
|                 |                            |                           | iv  | O=C•C(C)=CC=CC=O + HO <sub>2</sub>   | 2.46×10 <sup>-5</sup> |
| entire molecule | hexadienedial              | O=CC=CC=CC=O              | i   | C•=CC=CC=O + CO + HO <sub>2</sub>    | 4.77×10 <sup>-5</sup> |
|                 |                            |                           | ii  | O=CC=CC=CCO• + HO <sub>2</sub>       | 4.77×10 <sup>-5</sup> |
| entire molecule | glyoxal                    | O=CC=O                    | i   | 2 CO + HO <sub>2</sub>               | 3.44×10 <sup>-6</sup> |
|                 |                            |                           | ii  | 2 CO + 2 HO <sub>2</sub>             | 2.91×10 <sup>-5</sup> |
|                 |                            |                           | iii | CH2O + CO                            | 1.47×10 <sup>-5</sup> |
| entire molecule | peroxy acetyl nitrate      | O=COO[N](O)=O             |     | CC(=O)OO• + NO <sub>2</sub>          | 6.24×10 <sup>-7</sup> |
| entire molecule | oxalic acid                | OC(=O)C(=O)=O             | i   | CHO(OH) + CO <sub>2</sub>            | 3.55×10 <sup>-7</sup> |
|                 |                            |                           | ii  | CO2 + CO                             | 1.33×10 <sup>-7</sup> |
| entire molecule | glyoxylic acid             | OC(=O)C=O                 | i   | CH2O + CO <sub>2</sub>               | 1.26×10 <sup>-4</sup> |
|                 |                            |                           | ii  | CO + CO                              | 1.63×10 <sup>-5</sup> |
| entire molecule | glycolaldehyde             | OCC=O                     |     | CH2O + CO + 2 HO <sub>2</sub>        | 6.82×10 <sup>-6</sup> |
| entire molecule | nitrooxyethanol            | OCCO[N](O)=O              |     | OCCO• + NO <sub>2</sub>              | 6.00×10 <sup>-8</sup> |
| entire molecule | hydroxymethylhydroperoxide | OCOO                      |     | CH2(O•)(OH) + OH                     | 3.90×10 <sup>-6</sup> |

|                                         |                             |                       |     |                                            |                       |
|-----------------------------------------|-----------------------------|-----------------------|-----|--------------------------------------------|-----------------------|
| acid, a-keto-                           | pyruvic acid                | $RC(=O)C(=O)O$        |     | $RC(O)=O + CO_2$                           | $1.03 \times 10^{-4}$ |
| acid, a-C in epoxide, MCM(**)           | methyl vinyl ketone         | $RC1OC1C(=O)OO$       |     | $RC \bullet C=O + OH$                      | $4.29 \times 10^{-7}$ |
| acid, a-C in epoxide, MCM               | methyl vinyl ketone         | $RC1OC1C(=O)OO$       |     | $RC \bullet C=O + OH$                      | $4.29 \times 10^{-7}$ |
| a-di-ketone                             | biacetyl                    | $RC(=O)C(=O)R$        |     | $RC \bullet =O + RC \bullet =O$            | $2.29 \times 10^{-4}$ |
| a-di-ketone with b-hydroxy, MCM         | 2,3-butanedione (biacetyl)  | $RC(=O)C(=O)R$        |     | $RC \bullet =O + R \bullet + CO + HO_2$    | $2.29 \times 10^{-4}$ |
| aldehyde, 2ry a-C in epoxide, MCM       | i-butanal (i-butyraldehyde) | $RC1OC1(C)C=O$        |     | Various                                    | $3.80 \times 10^{-5}$ |
| aldehyde, 2ry unsaturated a-C, b-C, MCM | methacrolein                | $R=C(C)C=O$           | i   | $C=C \bullet C + CO + HO_2$                | $4.47 \times 10^{-6}$ |
|                                         |                             |                       | ii  | $C=C(C)CO \bullet + HO_2$                  | $4.47 \times 10^{-6}$ |
| aldehyde, 2ry unsaturated a-C           | acrolein                    | $RC(R)=C(R)C=O$       | i   | $RC(R)=C \bullet R + CO + HO_2$            | $2.65 \times 10^{-6}$ |
|                                         |                             |                       | ii  | Criegee radical + CO                       | $2.57 \times 10^{-6}$ |
|                                         |                             |                       | iii | $RC(R)=C(R)C \bullet =O + HO_2$            | $2.57 \times 10^{-6}$ |
| aldehyde, a-C in epoxide, MCM           | butanal                     | $RC1OC1C=O$           |     | $CCC \bullet + CO + HO_2$                  | $8.68 \times 10^{-6}$ |
| aldehyde, a-hydroperoxy-                | glycolaldehyde              | $RC(OO)(R)C=O$        |     | $RC \bullet (=O)R + CO + 2 HO_2$           | $6.82 \times 10^{-6}$ |
| aldehyde, a-hydroxy-                    | glycolaldehyde              | $RC(O)(R)C=O$         |     | $RC \bullet (=O)R + CO + HO_2 + OH$        | $6.82 \times 10^{-6}$ |
| aldehyde, a-keto-                       | methyl glyoxal              | $RC(=O)C=O$           | i   | $RC(=O)OO \bullet + CO + HO_2$             | $7.01 \times 10^{-5}$ |
|                                         |                             |                       | ii  | $RC=O + CO$                                | $3.90 \times 10^{-6}$ |
|                                         |                             |                       | iii | $R + 2 CO$                                 | $3.90 \times 10^{-6}$ |
| aldehyde, g-H, 1/2ry a-C a-C            | t-pentanal                  | $RCC=O$ or $RC(R)C=O$ | i   | $RC \bullet R$ or $RC \bullet + CO + HO_2$ | $6.63 \times 10^{-6}$ |
|                                         |                             |                       | ii  | Norrish II 1,4 biradical                   | $9.70 \times 10^{-6}$ |
| aldehyde, g-H, 3ry a-C                  | n-pentanal                  | $RC(R)C=O$            | i   | $RC \bullet (R)R + CO + HO_2$              | $4.69 \times 10^{-6}$ |
|                                         |                             |                       | ii  | Norrish II 1,4 biradical                   | $6.14 \times 10^{-6}$ |
| aldehyde, no g-H, 1ry a-C               | propanal                    | $RCC=O$               |     | $RC \bullet + CO + HO_2$                   | $1.30 \times 10^{-5}$ |
| aldehyde, no g-H, 2ry a-C               | i-butanal (i-butyraldehyde) | $RC(R)C=O$            |     | $RC \bullet R + CO + HO_2$                 | $3.80 \times 10^{-5}$ |
| aldehyde, no g-H, 3ry a-C               | t-pentanal                  | $RC(R)(R)C=O$         |     | $RC \bullet (R)R + CO + HO_2$              | $2.58 \times 10^{-5}$ |
| a-unsaturated g-di-aldehyde             | trans-butenedial            | $RC(C=O)=C(R)C(=O)$   | i   | $O=C1OCC=C1 + xC$                          | $4.69 \times 10^{-4}$ |
| a-unsaturated g-di-aldehyde             | butenedial                  |                       | ii  | $O=C1OC(=O)C=C1 + 2 HO_2 + xC$             | $4.69 \times 10^{-4}$ |

|                                 |                                     |                         |    |                                          |                      |
|---------------------------------|-------------------------------------|-------------------------|----|------------------------------------------|----------------------|
| a-unsaturated g-di-ketone       | 3-hexene-2,5-dione                  | $RC(=O)C(R)=C(R)C(=O)R$ | i  | $RC(=O)C=C(R)C\bullet=O + R\bullet$      | $4.04\times 10^{-4}$ |
| a-unsaturated g-di-ketone       |                                     |                         | ii | $O=C1OC(=O)C=C1 + xR$                    | $4.04\times 10^{-4}$ |
| a-unsaturated g-keto-aldehyde   | 4-oxo-2-pentenal                    | $RC(=O)C(R)=C(R)C(=O)$  | i  | $CC1=CC(=O)OC1 + xC$                     | $6.38\times 10^{-4}$ |
|                                 |                                     |                         | ii | $O=C1OC(=O)C=C1 + R\bullet + 2HO_2 + xC$ | $6.38\times 10^{-4}$ |
| a-unsaturated ketone            | methyl vinyl ketone                 | $RC=CC(=O)C$            | i  | $RC=CC + CO$                             | $4.29\times 10^{-6}$ |
| a-unsaturated ketone            |                                     |                         | ii | $RC=C\bullet + CC\bullet=O$              | $4.29\times 10^{-7}$ |
| ketone (various), MCM           | 2-butanone                          | $RC(=O)R$               |    | various products                         | $2.54\times 10^{-6}$ |
| ketone, a-hydroxy-              | hydroxyacetone                      | $RC(=O)C(O)R$           |    | $RC\bullet=O + RC\bullet O$              | $2.51\times 10^{-6}$ |
| ketone, no g-H, 2x2/3ry a-C     | 2,4-dimethyl pentanone              | $RC(R)C(=O)C(R)R$       |    | $RC(R)C\bullet=O + C\bullet(R)R$         | $8.30\times 10^{-6}$ |
| ketone, no g-H, 1ry + 2/3ry a-C | 3-pentanone, 2,4-dimethyl pentanone | $RC(R)C(=O)R$           |    | $RC(R)C\bullet=O + R\bullet$             | $5.69\times 10^{-6}$ |
| ketone, no g-H, 2x1ry a-C       | 3-pentanone                         | $RC(=O)R$               |    | $RC\bullet=O + R\bullet$                 | $3.07\times 10^{-6}$ |
| ketone, g-H, 2x2/3ry a-C        | 2,4-dimethyl pentanone              | $RC(R)C(=O)C(R)R$       | i  | $RC(R)C\bullet=O + C\bullet(R)R$         | $2.44\times 10^{-6}$ |
|                                 |                                     |                         | ii | Norrish II 1,4 biradical                 | $5.86\times 10^{-6}$ |
| ketone, g-H, 1ry + 2/3ry a-C    | 3-pentanone, 2,4-dimethyl pentanone | $RC(R)C(=O)R$           | i  | $RC(R)C\bullet=O + R\bullet$             | $1.67\times 10^{-6}$ |
|                                 |                                     |                         | ii | Norrish II 1,4 biradical                 | $4.02\times 10^{-6}$ |
| ketone, with g-H, 2x1ry a-C     | 3-pentanone                         | $RC(=O)R$               | i  | $RC\bullet=O + R\bullet$                 | $9.04\times 10^{-7}$ |
|                                 |                                     |                         | ii | Norrish II 1,4 biradical                 | $2.17\times 10^f$    |
| nitrate, 1ry a-C                | n-pentyl nitrate                    | $RCO[N](O)=O$           |    | $RCO\bullet + NO_2$                      | $1.71\times 10^{-6}$ |
| nitrate, 1ry a-C, MCM           | propyl nitrate                      | $RCO[N](O)=O$           |    | $RCO\bullet + NO_2$                      | $1.84\times 10^{-6}$ |
| nitrate, 2ry a-C                | 2-butyl nitrate                     | $RC(R)O[N](O)=O$        |    | $RC(R)O\bullet + NO_2$                   | $1.76\times 10^{-6}$ |
| nitrate, 2ry a-C, MCM           | i-propyl nitrate                    | $RC(R)O[N](O)=O$        |    | $RC(R)O\bullet + NO_2 (+ OH)$            | $1.93\times 10^{-6}$ |
| nitrate, 3ry a-C                | t-butyl nitrate                     | $RC(R)(R)O[N](O)=O$     |    | $RC(R)(R)O\bullet + NO_2$                | $5.66\times 10^{-6}$ |
| PAN                             | peroxy acetyl nitrate (PAN)         | $RC(=O)OO[N](O)=O$      |    | $RC\bullet=O + NO_2$                     | $6.24\times 10^{-7}$ |
| PAN, a-keto-                    | methyl glyoxal                      | $RC(=O)C(=O)OO[N](O)=O$ |    | $RC\bullet=O + CO + NO_2$                | $7.01\times 10^{-5}$ |

**Notation:**

(\*) SMILES formulae are used for species with more than 1 carbon, and are arranged according to the Unique SMILES format accessed online at: <http://cactus.nci.nih.gov/translate/> (last access on 28 January 2015)

(\*\*) MCM: photolysis rate assignments are made according to the MCM (Master Chemical Mechanism from Leeds)

93 (other) Notation '1ry,2ry,3ry' ignores the carbon in the main functional group  
94 1/2ry means primary or secondary  
95 2x2/3ry means that two 2ry or 3ry carbons are attached to the alpha-carbon  
96  $\gamma$ -H describes an abstractable hydrogen, 3 carbons away from the main functional group.  
97  $\alpha$ -C denotes the carbon alpha (adjacent) to the main functional group  
98  $\alpha$ -(group) describes a functional group attached to the alpha-carbon  
99 xC is a counter for 'lost carbon', that is, products with unknown fate.  
100
