# Supplementary material for: Organic photolysis reactions in tropospheric aerosols: effect on secondary organic aerosol formation and lifetime
Source: Copernicus journal article supplement (doi:10.5194/acp-15-9253-2015), 2015-08-20
Supplement: Supplementary file 1 [file 0SupportingInformation_revision.docx]

**Supporting Information**

**Annex I: Percent change in SOA concentrations and composition**

Figure S1: Percent change in SOA concentrations due to photolytic reactions in the gas phase (BASE, SENS_OH and SENS_OA runs) and in the condensed phase (*Jmolecmax* and *Jmac* runs). These simulations are all compared to the reference BASE dark simulation.

Figure S2: Percent change in functional groups (# per carbon) found in the particle phase due to gas-phase photolytic reactions of organic compounds. Results are for the BASE run, and the percentage represents (JON – JOFF)/ JOFF. Functional groups which absolute values are close to zero are not shown (e.g. nitrate at low NOx, hydroperoxides at high NOx, and aldehydes).

**Annex II: Sensitivity to diurnal cycle in J values**

Additional sensitivity simulations were performed to verify whether the sensitivity to gas-phase photolysis of the considered chemical systems changes between simulations assuming a permanent daylight (fixed J values like in the manuscript) vs. simulation considering a diurnal cycle for J values.

As shown on Figure S3, the response to gas-phase photolysis is very similar between the two sets of runs, with a decrease in SOA concentrations of about 20%.

Figure S3: GECKO-A predicted SOA concentrations for the oxidation of C12 n-alkanes at high NOx). Two types of simulations are shown i.e. in orange, simulations with daily varying photolysis values predicted by GECKO-A for Boulder (June 21), and in black, simulations with fixed J rates using the daily average J values from the previous run. In all simulations NOx was set to 10 ppb, and O3 to 40 ppb. In the diurnally varying simulations, OH was free running, whereas in the fixed J simulations OH was set to the diurnal average value of the previous run.

**Annex III: Choice of hydroperoxide rate constant**

Figure S4: Sensitivity of the results to the choice of the hydroperoxide rate constant at low NOx conditions for C12 and C16 n-alkane precursors. Sensitivity simulations are similar to the BASE case run, except that the rate for abstracting the H in -OOH in hydroperoxides was changed to 14 (which was the default value used in GECKO-A up to now (*Aumont et al., 2005*)). In the BASE case simulation (and throughout this paper) the used value is 3.5.

**Annex IV: Estimate of the light attenuation by an absorbing particle**

*1) Method 1:*

The light attenuation can be roughly estimated as a ratio between the absorption cross section of the particle and its physical cross section. Here we assume a typical organic particle with MAC = 0.1 m2 g-1, 200 nm diameter and 1.5 g/cm3 density.

Its optical cross section is MAC x mass of particle = 0.1 x 6.3 x 10-15 m2, whereas its geometric cross section is πr2 = 3.1 x 10-14 m2. Thus, the ratio between optical and geometric cross section is ~ 0.02, meaning that about 2% of photons are absorbed by the particle, and that the rest will go through the particle.

A more accurate estimate could be derived from the Mie theory, but the corrections due to the full theory are typically within a factor of 2 (Ray and Bhanti, 1997; Mayer and Madronich, 2004), and thus that is not required in this case.

For comparison, for soot MAC = 10 m2 g-1 and the ratio optical/geometric = 2, suggesting that substantial attenuation is expected to occur within the particle.

Ray A.K., and Bhanti D.D., Effect of optical resonances on photochemical reactions in microdroplets. Applied Optics, Vol. 36, No. 12, 1997.

Mayer B., and Madronich, S. Actinic flux and photolysis in water droplets: Mie calculations and geometrical optics limit. Atmos. Chem. Phys. 4, 2241–2250, 2004.

*2) Method 2:*

According to the Beer Lamber’s law the transmitted light can be written as:

I/I0 = exp(-MAC x ρ x L) (1)

Where MAC represents the mass absorption coefficient (m2 kg-1), ρ density of the particle (g cm-3), and L the particle diameter (m).

If we consider a particle with MAC = 0.1 m2 g-1, ρ = 1.5 g cm-3, and L = 2x10-5 cm, we can calculate I/I0 = 0.9704, which means that ~97% of the initial signal was transmitted.

The attenuation by the particle is ~3%. In other words, the optical depth of the considered particle is 0.03, which suggests that the attenuation of light (in the continuous model) is small.

**Annex V: Gas-phase photolysis used in GECKO-A**

Table S1: Gas-phase photolysis considered in GECKO-A for various species and functional group surrogates. Photolysis rates are calculated using the TUV model for 40°N and the solar zenith angle of 45°.

| **Species / functional group** | **Reference species** | **General formula (SMILES(*))** |  | **Typical products** | **J(s-1) at SZA=45°** |
| --- | --- | --- | --- | --- | --- |
|  |  | NO2 |  |  | 8.08×10-3 |
| entire molecule | propenal (acrolein) | C=CC=O | i | C=CC=O + HO2 | 5.55×10-7 |
| () | C= | ii | C=C + CO + HO2 | 4.16×10-7 |
| () | C= | iii | CC(OO)* + CO | 4.16×10-7 |
| entire molecule | methacrolein | CC(=C)C=O | i | C=CC + CO + HO2 | 4.47×10-6 |
|  |  | =O | ii | CC(OO)*C + CO | 4.47×10-6 |
|  |  |  | iii | C=C(C)CO + HO2 | 4.47×10-6 |
| entire molecule | acetone | CC(=O)C |  | CC=O + CH3 | 3.82×10-7 |
| entire molecule | 2,3-butanedione (biacetyl) | CC(=O)C(C)=O |  | 2 CC=O | 2.29×10-4 |
| entire molecule | pyruvic acid | CC(=O)C(O)=O |  | CC=O + CO2 | 1.03×10-4 |
| entire molecule | methyl vinyl ketone | CC(=O)C=C | i | C=CC + CO | 4.29×10-6 |
|  |  |  | ii | C=C + CC=O | 4.29×10-7 |
| entire molecule | methyl glyoxal | CC(=O)C=O | i | CC=O + CO + HO2 | 7.01×10-5 |
|  |  |  | ii | CC=O + CO | 3.90×10-6 |
|  |  |  | iii | CH4 + 2 CO | 3.90×10-6 |
| entire molecule | hydroxyacetone | CC(=O)CO |  | CC=O + CH2O + HO2 | 1.51×10-6 |
| entire molecule | 3,3-dimethyl butanal | CC(C)(C)CC=O |  | CC(C)(C)C + CO + HO2 | 2.58×10-5 |
| entire molecule | t-butyl nitrate | CC(C)(C)O[N](O)=O |  | CC(C)(C)O + NO2 | 5.66×10-6 |
| entire molecule | 2,4-dimethyl-3-pentanone | CC(C)C(=O)C(C)C |  | CC(C)C=O + CCC | 8.30×10-6 |
| entire molecule | i-butanal  (i-butryaldehyde) | CC(C)C=O |  | CCC + CO + HO2 | 3.80×10-5 |
| entire molecule | 4-methyl-2-pentanone | CC(C)CC(C)=O | i | CC(C)C + CC=O | 1.61×10-6 |
|  | 4-methyl-2-pentanone |  | ii | CC(=O)C + C=CC | 3.87×10-6 |
| entire molecule | 3-methyl butanal | CC(C)CC=O | i | CC(C)C + CO + HO2 | 1.54×10-5 |
|  | 3- |  | ii | C=CC + CC=O | 1.05×10-5 |
| entire molecule | 5-methyl-2-hexanone | CC(C)CCC(C)=O | i | CCC(C)C + CC=O | 1.28×10-6 |
|  | 5- |  | ii | C=C(C)C + CC(=O)C | 3.06×10-6 |
| entire molecule | i-propyl nitrate | CC(C)O[N](O)=O |  | CC(C)O + NO2 | 1.93×10-6 |
| entire molecule | butane-2,3-dinitrate | CC(O[N](O)=O)C(C)O[N](O)=O |  | CC(O)C(C)O[N](O)=O + NO2 | 7.41×10-6 |
| entire molecule | propane-1,2-dinitrate | CC(O[N](O)=O)CO[N](O)=O | i | CC(O)CO[N](O)=O + NO2 | 3.68×10-6 |
|  | 1,2-dinitrate | OO | ii | CC(O[N](O)=O)CO + NO2 | 3.68×10-6 |
| entire molecule | crotonaldehyde | CC=CC=O | i | CC=C + CO + HO2 | 3.29×10-6 |
|  |  | CC=CC=O | ii | CC=CCO + HO2 | 3.29×10-6 |
|  |  | CC=CC=O | iii | CCC (OO)* + CO | 3.29×10-6 |
| entire molecule | acetaldehyde | CC=O |  | CH3 + CO + HO2 | 3.51×10-6 |
| entire molecule | 3-pentanone | CCC(=O)CC |  | CCCO + CC | 3.07×10-6 |
| entire molecule | 2-butanone | CCC(C)=O | i | CC=O + CC | 2.54×10-6 |
|  | 2-butanone | CCC(C)=O | ii | CCC=O + CH3 | 4.37×10-7 |
| entire molecule | 2-methylbutylnitrate | CCC(C)CO[N](O)=O |  | CCC(C)CO + NO2 | 1.70×10-6 |
| entire molecule | butan-2-yl nitrate | CCC(C)O[N](O)=O |  | CC(O)CC + NO2 | 1.76×10-6 |
| entire molecule | pentan-3-yl nitrate | CCC(CC)O[N](O)=O |  | CCC(O)CC + NO2 | 1.64×10-6 |
| entire molecule | butane-1,2-dinitrate | CCC(O[N](O)=O)CO[N](O)=O | i | CCC(O)CO[N](O)=O + NO2 | 5.03×10-6 |
|  |  |  | ii | CCC(O[N](O)=O)CO + NO2 | 5.03×10-6 |
| entire molecule | propanal | CCC=O |  | CC + CO + HO2 | 1.30×10-5 |
| entire molecule | 2-pentanone | CCCC(C)=O |  | CCC + CC=O | 4.05×10-6 |
| entire molecule | pentan-2-yl nitrate | CCCC(C)O[N](O)=O |  | CC(O)CCC + NO2 | 1.69×10-6 |
| entire molecule | butanal | CCCC=O | i | CCC + CO + HO2 | 8.68×10-6 |
|  |  | CCCC=O | ii | C=C + CC=O | 2.74×10-6 |
| entire molecule | pentanal | CCCCC=O | i | CCCC + CO + HO2 | 6.63×10-6 |
|  |  | CCCCC=O | ii | C=CC + CC=O | 9.70×10-6 |
| entire molecule | hexanal | CCCCCC=O | i | CCCCC + CO + HO2 | 3.55×10-6 |
|  |  | CCCCCC=O | ii | C=CCC + CC=O | 8.27×10-6 |
| entire molecule | n-pentyl nitrate | CCCCCO[N](O)=O |  | CCCCCO + NO2 | 1.71×10-6 |
| entire molecule | n-butyl nitrate | CCCCO[N](O)=O |  | CCCCO + NO2 | 1.71×10-6 |
| entire molecule | propyl nitrate | CCCO[N](O)=O |  | CCCO + NO2 | 1.84×10-6 |
| entire molecule | ethyl nitrate | CCO[N](O)=O |  | CCO + NO2 | 1.16×10-6 |
| entire molecule | methyl nitrate | CO[N](O)=O |  | CH3(O) + NO2 | 7.27×10-7 |
| entire molecule | methyl hydroperoxide | COO |  | CH3(O) + HO | 4.25×10-6 |
| entire molecule | methyl peroxy nitrate | COO[N](O)=O | i | CH3(OO) + NO2 | 3.12×10-6 |
|  |  |  | ii | CH3(O) + NO3 | 3.12×10-6 |
| entire molecule | but-1-ene-3,4-dinitrate | O[N](=O)OCC(O[N](O)=O)C=C | i | O[N](=O)OCC(O)C=C + NO2 | 2.23×10-6 |
|  |  |  | ii | OCC(O[N](O)=O)C=C + NO2 | 2.23×10-6 |
| entire molecule | but-2-ene-1,4-dinitrate | O[N](=O)OCC=CCO[N](O)=O |  | OCC=CCO[N](O)=O + NO2 | 4.39×10-6 |
| entire molecule | 2-methyl hexadienedial | O=CC(C)=CC=CC=O | i | O=CC(C)=CC=C + CO + HO2 | 2.46×10-5 |
|  |  | O=CC(C)=CC=CC=O | ii | CC=CC=CC=O + CO + HO2 | 2.46×10-5 |
|  |  | O=CC(C)=CC=CC=O | iii | O=CC(C)=CC=CC=O + HO2 | 2.46×10-5 |
|  |  | O=CC(C)=CC=CC=O | iv | O=CC(C)=CC=CC=O + HO2 | 2.46×10-5 |
| entire molecule | hexadienedial | O=CC=CC=CC=O | i | C=CC=CC=O + CO + HO2 | 4.77×10-5 |
|  |  | O=CC=CC=CC=O | ii | O=CC=CC=CCO + HO2 | 4.77×10-5 |
| entire molecule | glyoxal | O=CC=O | i | 2 CO + HO2 | 3.44×10-6 |
|  |  | O=CC=O | ii | 2 CO + 2 HO2 | 2.91×10-5 |
|  |  | O=CC=O | iii | CH2O + CO | 1.47×10-5 |
| entire molecule | peroxy acetyl nitrate | O=COO[N](O)=O |  | CC(=O)OO + NO2 | 6.24×10-7 |
| entire molecule | oxalic acid | OC(=O)C(O)=O | i | CHO(OH) + CO2 | 3.55×10-7 |
|  |  |  | ii | CO2 + CO | 1.33×10-7 |
| entire molecule | glyoxylic acid | OC(=O)C=O | i | CH2O + CO2 | 1.26×10-4 |
|  |  |  | ii | CO + CO | 1.63×10-5 |
| entire molecule | glycolaldehyde | OCC=O |  | CH2O + CO + 2 HO2 | 6.82×10-6 |
| entire molecule | nitrooxyethanol | OCCO[N](O)=O |  | OCCO+ NO2 | 6.00×10-8 |
| entire molecule | hydroxymethylhydroperoxide | OCOO |  | CH2(O)(OH) + OH | 3.90×10-6 |
|  |  |  |  |  |  |
| acid, -keto- | pyruvic acid | RC(=O)C(OO)=O |  | RC(O)=O + CO2 | 1.03×10-4 |
| acid,-C in epoxide, MCM(**) | methyl vinyl ketone | RC1OC1C(=O)OO |  | RCC=O + OH | 4.29×10-7 |
| acid,-C in epoxide, MCM | methyl vinyl ketone | RC1OC1C(=O)OO |  | RCC=O + OH | 4.29×10-7 |
| -di-ketone | biacetyl | RC(=O)C(=O)R |  | RC=O + RC=O | 2.29×10-4 |
| -di-ketone with -hydroxy, MCM | 2,3-butanedione (biacetyl) | RC(=O)C(=O)R |  | RC=O + R + CO + HO2 | 2.29×10-4 |
| aldehyde, 2ry -C in epoxide, MCM | i-butanal  (i-butryaldehyde) | RC1OC1(C)C=O |  | Various | 3.80×10-5 |
| aldehyde, 2ry unsaturated ‑C‑C, MCM | methacrolein | R=C(C)C=O | i | C=CC + CO + HO2 | 4.47×10-6 |
|  | R | ii | C=C(C)CO + HO2 | 4.47×10-6 |
| aldehyde, 2ry unsaturated ‑C | acrolein | RC(R)=C(R)C=O | i | RC(R)=CR + CO + HO2 | 2.65×10-6 |
|  |  | ii | Criegge radical + CO | 2.57×10-6 |
|  |  | iii | RC(R)=C(R)C=O + HO2 | 2.57×10-6 |
| aldehyde, -C in epoxide, MCM | butanal | RC1OC1C=O |  | CCC + CO + HO2 | 8.68×10-6 |
| aldehyde, -hydroperoxy- | glycolaldehyde | RC(OO)(R)C=O |  | RC (=O)R + CO + 2 HO2 | 6.82×10-6 |
| aldehyde, -hydroxy- | glycolaldehyde | RC(O)(R)C=O |  | RC (=O)R + CO + HO2 + OH | 6.82×10-6 |
| aldehyde, -keto- | methyl glyoxal | RC(=O)C=O | i | RC(=O)OO + CO + HO2 | 7.01×10-5 |
|  |  |  | ii | RC=O + CO | 3.90×10-6 |
|  |  |  | iii | R + 2 CO | 3.90×10-6 |
| aldehyde, -H, 1/2ry -C | t-pentanal | RCC=O or RC(R)C=O | i | RCR or RC + CO + HO2 | 6.63×10-6 |
| a-C |  |  | ii | Norrish II 1,4 biradical | 9.70×10-6 |
| aldehyde, -H, 3ry -C | n-pentanal | RC(R)C=O | i | RC(R)R + CO + HO2 | 4.69×10-6 |
|  |  |  | ii | Norrish II 1,4 biradical | 6.14×10-6 |
| aldehyde, no -H, 1ry -C | propanal | RCC=O |  | RC + CO + HO2 | 1.30×10-5 |
| aldehyde, no -H, 2ry -C | i-butanal  (i-butryaldehyde) | RC(R)C=O |  | RCR + CO + HO2 | 3.80×10-5 |
| aldehyde, no -H, 3ry -C | t-pentanal | RC(R)(R)C=O |  | RC(R)R + CO + HO2 | 2.58×10-5 |
| -unsaturated -di-aldehyde | trans-butenedial | RC(C=O)=C(R)C(=O) | i | O=C1OCC=C1 + xC | 4.69×10-4 |
| -unsaturated -di-aldehyde | butenedial |  | ii | O=C1OC(=O)C=C1 + 2 HO2 + xC | 4.69×10-4 |
| -unsaturated -di-ketone | 3-hexene-2,5-dione | RC(=O)C(R)=C(R)C(=O)R | i | RC(=O)C=C(R)C=O + R | 4.04×10-4 |
| -unsaturated -di-ketone |  |  | ii | O=C1OC(=O)C=C1 + xR | 4.04×10-4 |
| -unsaturated -keto-aldehyde | 4-oxo-2-pentenal | RC(=O)C(R)=C(R)C(=O) | i | CC1=CC(=O)OC1 + xC | 6.38×10-4 |
|  | ii | O=C1OC(=O)C=C1 + R + 2 HO2 + xC | 6.38×10-4 |
| -unsaturated ketone | methyl vinyl ketone | RC=CC(=O)C | i | RC=CC + CO | 4.29×10-6 |
| -unsaturated ketone |  |  | ii | RC=C + CC=O | 4.29×10-7 |
| ketone (various), MCM | 2-butanone | RC(=O)R |  | various products | 2.54×10-6 |
| ketone, -hydroxy- | hydroxyacetone | RC(=O)C(O)R |  | RC=O + RCO | 2.51×10-6 |
| ketone, no -H, 2x2/3ry -C | 2,4-dimethyl pentanone | RC(R)C(=O)C(R)R |  | RC(R)C=O + C(R)R | 8.30×10-6 |
| ketone, no -H,  1ry + 2/3ry ‑C | 3-pentanone,  2,4-dimethyl pentanone | RC(R)C(=O)R |  | RC(R)C=O + R | 5.69×10-6 |
| ketone, no -H, 2x1ry -C | 3-pentanone | RC(=O)R |  | RC=O + R | 3.07×10-6 |
| ketone, -H, 2x2/3ry -C | 2,4-dimethyl pentanone | RC(R)C(=O)C(R)R | i | RC(R)C=O + C(R)R | 2.44×10-6 |
|  |  | ii | Norrish II 1,4 biradical | 5.86×10-6 |
| ketone, -H, 1ry + 2/3ry -C | 3-pentanone,  2,4-dimethyl pentanone | RC(R)C(=O)R | i | RC(R)C=O + R | 1.67×10-6 |
| ii | Norrish II 1,4 biradical | 4.02×10-6 |
| ketone, with -H, 2x1ry -C | 3-pentanone | RC(=O)R | i | RC=O + R | 9.04×10-7 |
|  | 3-pentanone |  | ii | Norrish II 1,4 biradical | 2.17×10f |
| nitrate, 1ry -C | n-pentyl nitrate | RCO[N](O)=O |  | RCO + NO2 | 1.71×10-6 |
| nitrate, 1ry -C, MCM | propyl nitrate | RCO[N](O)=O |  | RCO + NO2 | 1.84×10-6 |
| nitrate, 2ry -C | 2-butyl nitrate | RC(R)O[N](O)=O |  | RC(R)O + NO2 | 1.76×10-6 |
| nitrate, 2ry -C, MCM | i-propyl nitrate | RC(R)O[N](O)=O |  | RC(R)O + NO2 (+ OH) | 1.93×10-6 |
| nitrate, 3ry -C | t-butyl nitrate | RC(R)(R)O[N](O)=O |  | RC(R)(R)O + NO2 | 5.66×10-6 |
| PAN | peroxy acetyl nitrate (PAN) | RC(=O)OO[N](O)=O |  | RC=O + NO2 | 6.24×10-7 |
| PAN, -keto- | methyl glyoxal | RC(=O)C(=O)OO[N](O)=O |  | RC=O + CO + NO2 | 7.01×10-5 |

***Notation:***

(*) SMILES formulae are used for species with more than 1 carbon, and are arranged according to the Unique SMILES format accessed online at: http://cactus.nci.nih.gov/translate/ (last access on 28 January 2015)

(**) MCM: photolysis rate assignments are made according to the MCM (Master Chemical Mechanism from Leeds)

(other) Notation '1ry,2ry,3ry' ignores the carbon in the main functional group

1/2ry means primary or secondary

2x2/3ry means that two 2ry or 3ry carbons are attached to the alpha-carbon

γ-H describes an abstractable hydrogen, 3 carbons away from the main functional group.

α-C denotes the carbon alpha (adjacent) to the main functional group

α-(group) describes a functional group attached to the alpha-carbon

xC is a counter for ‘lost carbon’, that is, products with unknown fate.
