# Supplementary material for: Organic photolysis reactions in tropospheric aerosols: effect on secondary organic aerosol formation and lifetime
Source: Copernicus journal article supplement (doi:10.5194/acp-15-9253-2015), 2015-08-20
Supplement: Supplementary file [file acp-15-9253-2015-supplement-title-page.pdf › acp-15-9253-2015-supplement-title-page.pdf]

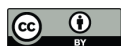

## *Supplement of*

# **Organic photolysis reactions in tropospheric aerosols: effect on secondary organic aerosol formation and lifetime**

**A. Hodzic et al.**

*Correspondence to:* A. Hodzic (alma@ucar.edu)

- acp-15-9253-2015-supplement-title-page.pdf
- 0SupportingInformation\_revision.2.pdf
- 0SupportingInformation\_revision.docx
- 0SupportingInformation\_revision.pdf
- \_\_MACOSX
  - .\_0SupportingInformation\_revision.2.pdf
  - .\_0SupportingInformation\_revision.docx
  - .\_0SupportingInformation\_revision.pdf

The copyright of individual parts of the supplement might differ from the CC-BY 3.0 licence.
